# Supplementary material for: Gut Microbiota Deficiency Exacerbates Liver Injury in Bile Duct Ligated Mice via Inflammation and Lipid Metabolism
Source: MDPI journal article supplement (doi:10.3390/ijms24043180), 2023-02-06
Supplement: s1 [file s1]

**Figure S1.**

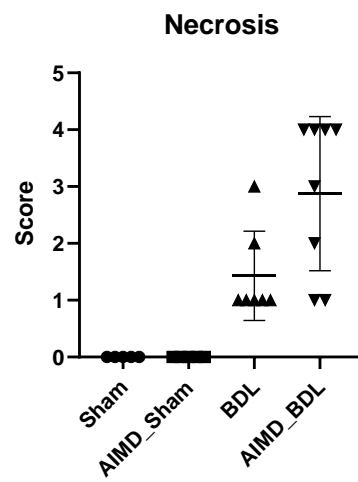

HE staining of liver tissues showed a significant higher scores for necrosis in the AIMD\_BDL mice compared with the BDL mice.

Figure S2.

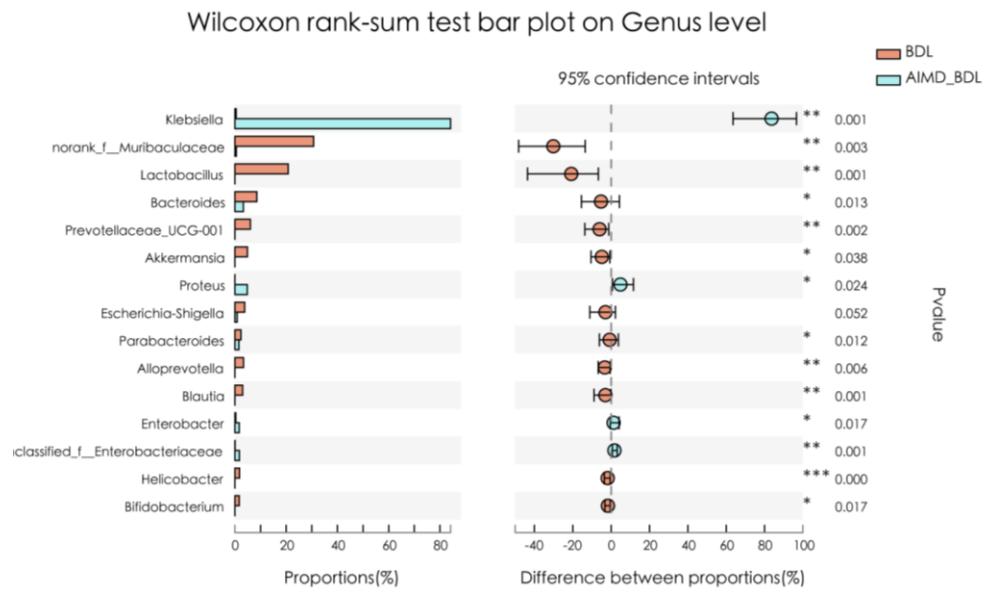

Relative abundances of top 15 genera responsible for discriminating the BDL and AIMD\_BDL groups. BDL, n = 7; AIMD\_BDL groups, n = 8. \* P < 0.05 vs control; \*\* P < 0. 01; \*\*\* P < 0. 001.

Figure S3.

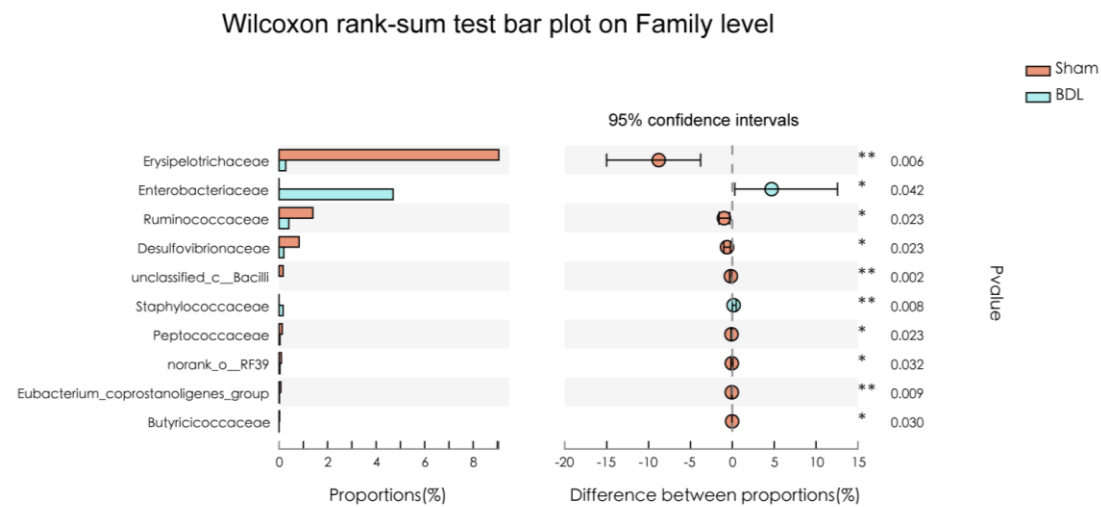

Relative abundances of top 10 families responsible for discriminating the BDL and Sham groups. BDL group, n = 7; Sham groups, n = 5. \*  $P < 0.05$  vs control; \*\*  $P < 0.01$ .

**Figure S4.**

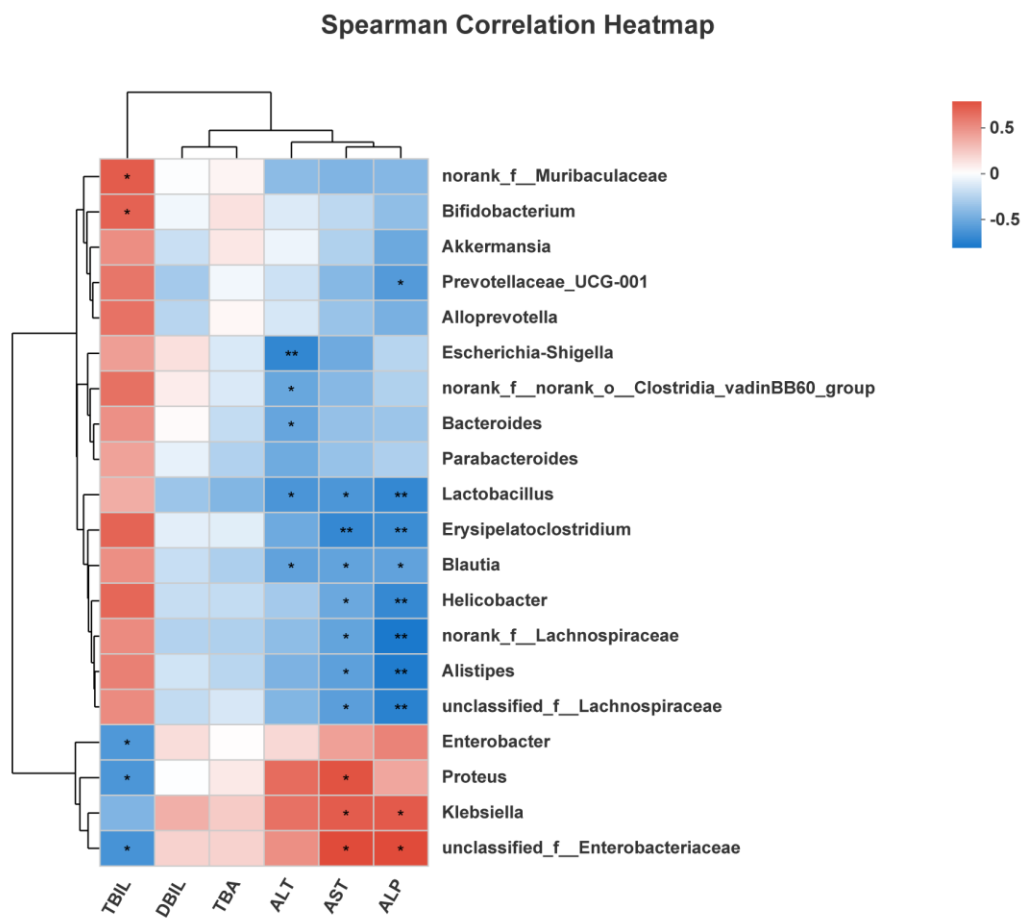

The association between gut microbiota and serum markers of liver injury in AIMD\_BDL group and BDL group at genus level. Red represents positive correlation, and blue represents negative correlation. \*  $P < 0.05$ ; \*\*  $P < 0.01$ ; \*\*\*  $P < 0.001$ .

**Table S1.** 16S RNA sequencing details for each sample.

| ID   | Group name | Seq_num | Base_num | Mean_length | Min_length | Max_length |
|------|------------|---------|----------|-------------|------------|------------|
| Sh1  | Sham       | 55649   | 23486983 | 422.055796  | 332        | 511        |
| Sh2  | Sham       | 51971   | 21897431 | 421.33942   | 277        | 494        |
| Sh3  | Sham       | 47703   | 20095016 | 421.252668  | 248        | 496        |
| Sh4  | Sham       | 53288   | 22569785 | 423.543481  | 262        | 438        |
| Sh5  | Sham       | 64638   | 27091437 | 419.125545  | 280        | 483        |
| ASh1 | AIMD_sham  | 36566   | 15684610 | 428.939725  | 403        | 430        |
| ASh2 | AIMD_sham  | 40671   | 17447275 | 428.985641  | 404        | 454        |
| ASh3 | AIMD_sham  | 45508   | 19522319 | 428.98653   | 404        | 472        |
| ASh4 | AIMD_sham  | 40207   | 17248339 | 428.98846   | 404        | 478        |
| ASh5 | AIMD_sham  | 41546   | 17820449 | 428.932966  | 308        | 431        |
| B1   | BDL        | 38171   | 16096295 | 421.68911   | 345        | 444        |
| B2   | BDL        | 61252   | 25863295 | 422.24409   | 265        | 430        |
| B3   | BDL        | 52977   | 22242598 | 419.853861  | 252        | 444        |
| B4   | BDL        | 37707   | 16146914 | 428.220596  | 277        | 477        |
| B5   | BDL        | 56101   | 23632010 | 421.240441  | 258        | 473        |
| B6   | BDL        | 46688   | 19725582 | 422.497901  | 277        | 444        |
| B7   | BDL        | 56287   | 23768281 | 422.269458  | 325        | 445        |
| AB1  | AIMD_BDL   | 61044   | 26187085 | 428.987042  | 404        | 430        |
| AB2  | AIMD_BDL   | 36575   | 15573043 | 425.783814  | 333        | 444        |
| AB3  | AIMD_BDL   | 37909   | 16262252 | 428.981297  | 371        | 503        |
| AB4  | AIMD_BDL   | 38416   | 16479933 | 428.986178  | 404        | 430        |
| AB5  | AIMD_BDL   | 44843   | 19237073 | 428.9872    | 404        | 431        |
| AB6  | AIMD_BDL   | 38497   | 16514273 | 428.975583  | 282        | 430        |
| AB7  | AIMD_BDL   | 41269   | 17701606 | 428.932274  | 403        | 517        |
| AB8  | AIMD_BDL   | 38054   | 16317937 | 428.810033  | 251        | 431        |

Sham, sham surgery; BDL, bile duct-ligated surgery; AIMD, Antibiotic-induced microbiome depletion.

**Table S2.** Alpha diversity for each sample.

| ID   | Group     | sobs | shannon | simpson | ace      | chao     | invsimpson | coverage |
|------|-----------|------|---------|---------|----------|----------|------------|----------|
| Sh1  | Sham      | 392  | 4.0801  | 0.0364  | 442.5732 | 447.5610 | 27.4894    | 0.9977   |
| Sh2  | Sham      | 377  | 4.0832  | 0.0336  | 416.7544 | 420.8718 | 29.7997    | 0.9980   |
| Sh3  | Sham      | 346  | 3.7978  | 0.0665  | 392.6966 | 427.3750 | 15.0372    | 0.9979   |
| Sh4  | Sham      | 336  | 3.7310  | 0.0521  | 388.6073 | 407.5000 | 19.2063    | 0.9978   |
| Sh5  | Sham      | 285  | 2.6387  | 0.2256  | 331.2086 | 342.0000 | 4.4318     | 0.9981   |
| ASh1 | AIMD_sham | 32   | 0.1455  | 0.9565  | 85.1375  | 67.0000  | 1.0455     | 0.9995   |
| ASh2 | AIMD_sham | 17   | 0.1725  | 0.9415  | 177.9428 | 72.0000  | 1.0622     | 0.9996   |
| ASh3 | AIMD_sham | 19   | 0.1027  | 0.9697  | 117.3406 | 74.0000  | 1.0313     | 0.9996   |
| ASh4 | AIMD_sham | 14   | 0.3542  | 0.8466  | 22.7500  | 17.3333  | 1.1812     | 0.9998   |
| ASh5 | AIMD_sham | 19   | 0.1580  | 0.9527  | 25.7552  | 21.0000  | 1.0497     | 0.9999   |
| B1   | BDL       | 154  | 2.6791  | 0.1328  | 188.8539 | 217.0000 | 7.5321     | 0.9988   |
| B2   | BDL       | 148  | 3.1352  | 0.0786  | 169.3606 | 180.5000 | 12.7250    | 0.9991   |
| B3   | BDL       | 277  | 3.3344  | 0.0791  | 307.3671 | 304.9730 | 12.6369    | 0.9985   |
| B4   | BDL       | 208  | 1.6315  | 0.3578  | 244.2514 | 237.2162 | 2.7945     | 0.9984   |
| B5   | BDL       | 240  | 3.0548  | 0.1178  | 281.5917 | 274.8710 | 8.4902     | 0.9984   |
| B6   | BDL       | 268  | 3.0984  | 0.1138  | 301.2110 | 322.0500 | 8.7890     | 0.9984   |
| B7   | BDL       | 263  | 3.1818  | 0.1169  | 282.5387 | 281.3704 | 8.5568     | 0.9989   |
| AB1  | AIMD_BDL  | 10   | 0.1441  | 0.9529  | 13.6857  | 11.5000  | 1.0495     | 0.9999   |
| AB2  | AIMD_BDL  | 61   | 2.0114  | 0.1847  | 63.8895  | 62.6667  | 5.4132     | 0.9998   |
| AB3  | AIMD_BDL  | 17   | 0.0673  | 0.9799  | 302.4341 | 50.0000  | 1.0205     | 0.9996   |
| AB4  | AIMD_BDL  | 8    | 0.0837  | 0.9750  | 11.6667  | 9.0000   | 1.0256     | 0.9999   |
| AB5  | AIMD_BDL  | 13   | 0.2396  | 0.9146  | 34.2342  | 23.0000  | 1.0933     | 0.9998   |
| AB6  | AIMD_BDL  | 18   | 0.2000  | 0.9301  | 23.5000  | 21.7500  | 1.0752     | 0.9998   |
| AB7  | AIMD_BDL  | 57   | 0.8857  | 0.5104  | 124.1668 | 114.2727 | 1.9591     | 0.9988   |
| AB8  | AIMD_BDL  | 94   | 0.4515  | 0.8324  | 140.9383 | 131.0500 | 1.2013     | 0.9987   |

Sham, sham surgery; BDL, bile duct-ligated surgery; AIMD, Antibiotic-induced microbiome depletion.
